# Supplementary material
Source: PubMed Central journal article supplement (PMC8021421)
Supplement: 6552_Appendix.pdf [file 6552_Appendix.pdf]

**APPENDIX. French Translation of the Wisconsin Quality of Life (F-WISQOL) questionnaire**

Wisconsin Stone-QOL

Questionnaire WISONSIN “VIVRE AVEC DES CALCULS RÉNAUX”

Ce questionnaire vise à évaluer la qualité de vie des patients avec **des** antécédents de calculs rénaux. Les questions ci-dessous cherchent à comprendre comment les problèmes reliés aux calculs rénaux vous ont affectés au cours du dernier mois.

Quelques questions peuvent se ressembler, mais chacune **d’entre** elles est différente. Veuillez répondre honnêtement aux questions. Même s’il est possible que vous ayez d’autres problèmes physiques ou médicaux, s’il vous plaît essayez de votre mieux de réfléchir uniquement **aux** les problèmes en lien avec les calculs rénaux. Toute information demeure confidentielle. Merci pour votre participation!

1. Au cours des 4 dernières semaines, démontrez votre niveau d’accord avec les affirmations suivantes :

|                                                                              | Tout à fait d’accord | D’accord | Partiellement d’accord | Un peu d’accord | Pas du tout d’accord |
|------------------------------------------------------------------------------|----------------------|----------|------------------------|-----------------|----------------------|
| A) Mon niveau d’énergie durant la journée est <b>moindre</b> qu’à l’habitude | 1                    | 2        | 3                      | 4               | 5                    |
| B) Je me sens très fatigué                                                   | 1                    | 2        | 3                      | 4               | 5                    |
| C) Mon niveau d’activité est limité                                          | 1                    | 2        | 3                      | 4               | 5                    |

2. À cause des pierres aux reins, démontrez votre niveau d’accord par rapport **aux problèmes** suivants au cours des 4 dernières semaines :

|                                                                            | Tout à fait d’accord | D’accord | Partiellement d’accord | Un peu d’accord | Pas du tout d’accord |
|----------------------------------------------------------------------------|----------------------|----------|------------------------|-----------------|----------------------|
| A) Difficulté à s’endormir ou se réveiller durant le sommeil               | 1                    | 2        | 3                      | 4               | 5                    |
| B) Nécessité de se réveiller fréquemment lors du sommeil pour uriner       | 1                    | 2        | 3                      | 4               | 5                    |
| C) Mauvaise qualité de sommeil ou ne pas se sentir reposé après le sommeil | 1                    | 2        | 3                      | 4               | 5                    |
| D) Difficulté à s’endormir de nouveau                                      | 1                    | 2        | 3                      | 4               | 5                    |

**Bhojani N, et al. Validation of the French version of the Wisconsin Quality of Life (WISQOL) questionnaire for patients with nephrolithiasis**

3. À cause des pierres aux reins, démontrez votre niveau d'accord avec ces affirmations au cours des 4 dernières semaines :

|                                                                                                                                                | Tout à fait d'accord | D'accord | Partiellement d'accord | Un peu d'accord | Pas du tout d'accord |
|------------------------------------------------------------------------------------------------------------------------------------------------|----------------------|----------|------------------------|-----------------|----------------------|
| A) Je suis réticent à voyager ou participer à des événements sociaux                                                                           | 1                    | 2        | 3                      | 4               | 5                    |
| B) Je dois me forcer pour aller travailler, aller à l'école, ( <b>à</b> ) faire de l'exercice ou ( <b>à</b> ) remplir d'autres responsabilités | 1                    | 2        | 3                      | 4               | 5                    |
| C) Je me suis absenté <b>du</b> travail, <b>ai</b> passé moins de temps en famille ou <b>ai</b> perdu l'intérêt <b>pour</b> mes loisirs        | 1                    | 2        | 3                      | 4               | 5                    |
| D) J'effectue des changements ou ajustements de façon régulière à mon horaire quotidien                                                        | 1                    | 2        | 3                      | 4               | 5                    |
| E) J'ai de la difficulté à me concentrer sur mon travail, sur ma famille ou autres engagements et intérêts                                     | 1                    | 2        | 3                      | 4               | 5                    |

4. À cause des pierres aux reins, durant les 4 dernières semaines, à quelle fréquence avez-vous ressenti :

|                                                                                                  | Toujours ou presque toujours | Très souvent | Souvent | Presque jamais | Jamais |
|--------------------------------------------------------------------------------------------------|------------------------------|--------------|---------|----------------|--------|
| A) <b>De la</b> difficulté à ( <b>m'</b> ) adhérer aux recommandations diététiques               | 1                            | 2            | 3       | 4              | 5      |
| B) <b>De la</b> difficulté à tolérer ou <b>à</b> prendre les médicaments prescrits comme indiqué | 1                            | 2            | 3       | 4              | 5      |
| C) <b>Des</b> préoccupations sur <b>votre</b> santé globale                                      | 1                            | 2            | 3       | 4              | 5      |

5. Quelques symptômes physiques reliés aux pierres aux reins se trouvent ci-dessous. Au cours des 4 dernières semaines, à quelle fréquence avez-vous éprouvé ces symptômes?

|                                                | Toujours ou presque toujours | Très souvent | Souvent | Presque jamais | Jamais |
|------------------------------------------------|------------------------------|--------------|---------|----------------|--------|
| A) Nausées, maux de ventre ou crampes          | 1                            | 2            | 3       | 4              | 5      |
| B) Douleur physique                            | 1                            | 2            | 3       | 4              | 5      |
| C) Fréquence urinaire <b>augmentée</b>         | 1                            | 2            | 3       | 4              | 5      |
| <b>D) Envie pressante ou soudaine d'uriner</b> | 1                            | 2            | 3       | 4              | 5      |

6. À cause des pierres aux reins, au cours des 4 dernières semaines, démontrez votre niveau d'accord avec les affirmations suivantes.

|                                                                                                                 | Tout à fait d'accord | D'accord | Partiellement d'accord | Un peu d'accord | Pas du tout d'accord |
|-----------------------------------------------------------------------------------------------------------------|----------------------|----------|------------------------|-----------------|----------------------|
| A) J'ai moins d'intérêt <b>pour</b> les relations sexuelles ou j'ai moins de relations sexuelles que d'habitude | 1                    | 2        | 3                      | 4               | 5                    |
| B) Je dois <b>prévoir</b> des <b>accommodements spéciaux</b> lors de voyages                                    | 1                    | 2        | 3                      | 4               | 5                    |
| C) J'ai moins d'intérêt que d'habitude <b>pour</b> les relations sociales                                       | 1                    | 2        | 3                      | 4               | 5                    |

7. Au cours des 4 dernières semaines, à cause des pierres aux reins, à quelle fréquence **vous êtes-vous senti**:

|                                                                                                | Très souvent | Souvent | Quelque peu | Peu souvent | Jamais |
|------------------------------------------------------------------------------------------------|--------------|---------|-------------|-------------|--------|
| A) Frustré avec <b>votre</b> situation actuelle                                                | 1            | 2       | 3           | 4           | 5      |
| B) Inquiet <b>avec ce qui va mal</b> présentement                                              | 1            | 2       | 3           | 4           | 5      |
| <b>C) Anxieux ou nerveux avec ce qui peut aller mal dans le futur</b>                          | 1            | 2       | 3           | 4           | 5      |
| D) Agacé <b>par</b> les inconforts et inconvénients <b>associés à votre</b> situation actuelle | 1            | 2       | 3           | 4           | 5      |

***Bhojani N, et al. Validation of the French version of the Wisconsin Quality of Life (WISQOL) questionnaire for patients with nephrolithiasis***

|                                                                                                                 |   |   |   |   |   |
|-----------------------------------------------------------------------------------------------------------------|---|---|---|---|---|
| E) <b>Plus incapacité</b> , comparée à l'habitude, à faire face aux difficultés ou responsabilités quotidiennes | 1 | 2 | 3 | 4 | 5 |
| F) Plus irritable que d'habitude                                                                                | 1 | 2 | 3 | 4 | 5 |

\*Quelques questions vous **concernant...** AU COURS DES 4 DERNIÈRES SEMAINES  
(Veuillez encercler **votre** réponse) :

|                                                                                                                                   |                |     |         |
|-----------------------------------------------------------------------------------------------------------------------------------|----------------|-----|---------|
| 1) <b>Avez-vous eu</b> des pierres aux reins dans votre appareil urinaire?                                                        | Oui            | Non | Pas sûr |
| 2) <b>Avez-vous</b> ressenti de la douleur ou des symptômes reliés aux pierres aux reins?                                         | Oui            | Non | Pas sûr |
| 3) <b>Avez-vous consulté à l'urgence</b> pour des pierres aux reins?                                                              | Oui            | Non | Pas sûr |
| 4) Aviez-vous vécu un évènement difficile ou traumatisant?                                                                        | Oui            | Non | Pas sûr |
| 5) Avez-vous été hospitalisé ou atteint de façon sérieuse <b>par</b> un problème de santé <u>NON RELIÉ</u> aux pierres aux reins? | Oui            | Non | Pas sûr |
| 6) Votre sexe (encercler un choix) :      Homme      Femme                                                                        | 7) Votre âge : |     |         |
